# Supplementary material for: Adipocyte nuclei captured from VAT and SAT
Source: PubMed Central journal article supplement (PMC4949929; doi:10.1186/s40608-016-0112-6), 2016-07-19

# Figure S3. Map of SUN1mRFP1Flag coding sequence

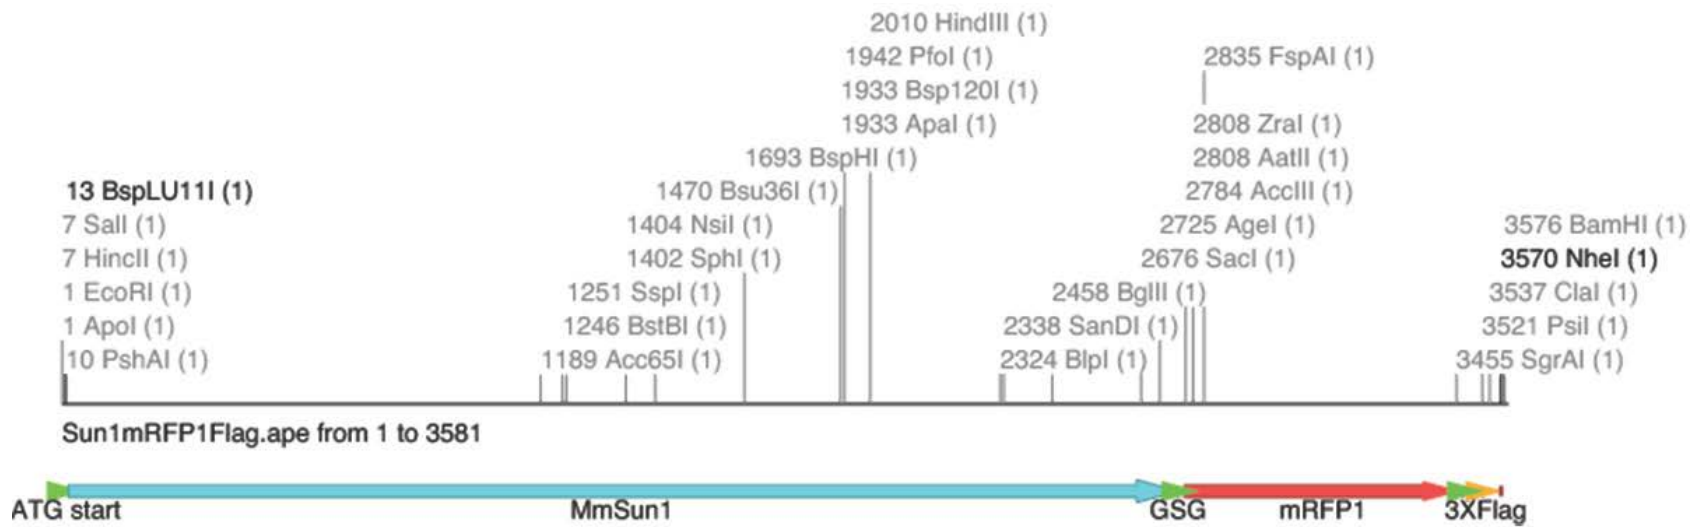

Supplement: 40608_2016_112_MOESM3_ESM.pdf [file 40608_2016_112_MOESM3_ESM.pdf]
