# Supplementary material for: Adipocyte nuclei captured from VAT and SAT
Source: PubMed Central journal article supplement (PMC4949929; doi:10.1186/s40608-016-0112-6), 2016-07-19
Supplement: 40608_2016_112_MOESM7_ESM.pdf [file 40608_2016_112_MOESM7_ESM.pdf]

# Supplemental Figure S8. Breeding of the ADNp::SUN1mRFP1Flag mice. A. Litter Progression from Founder #23 (C-line)

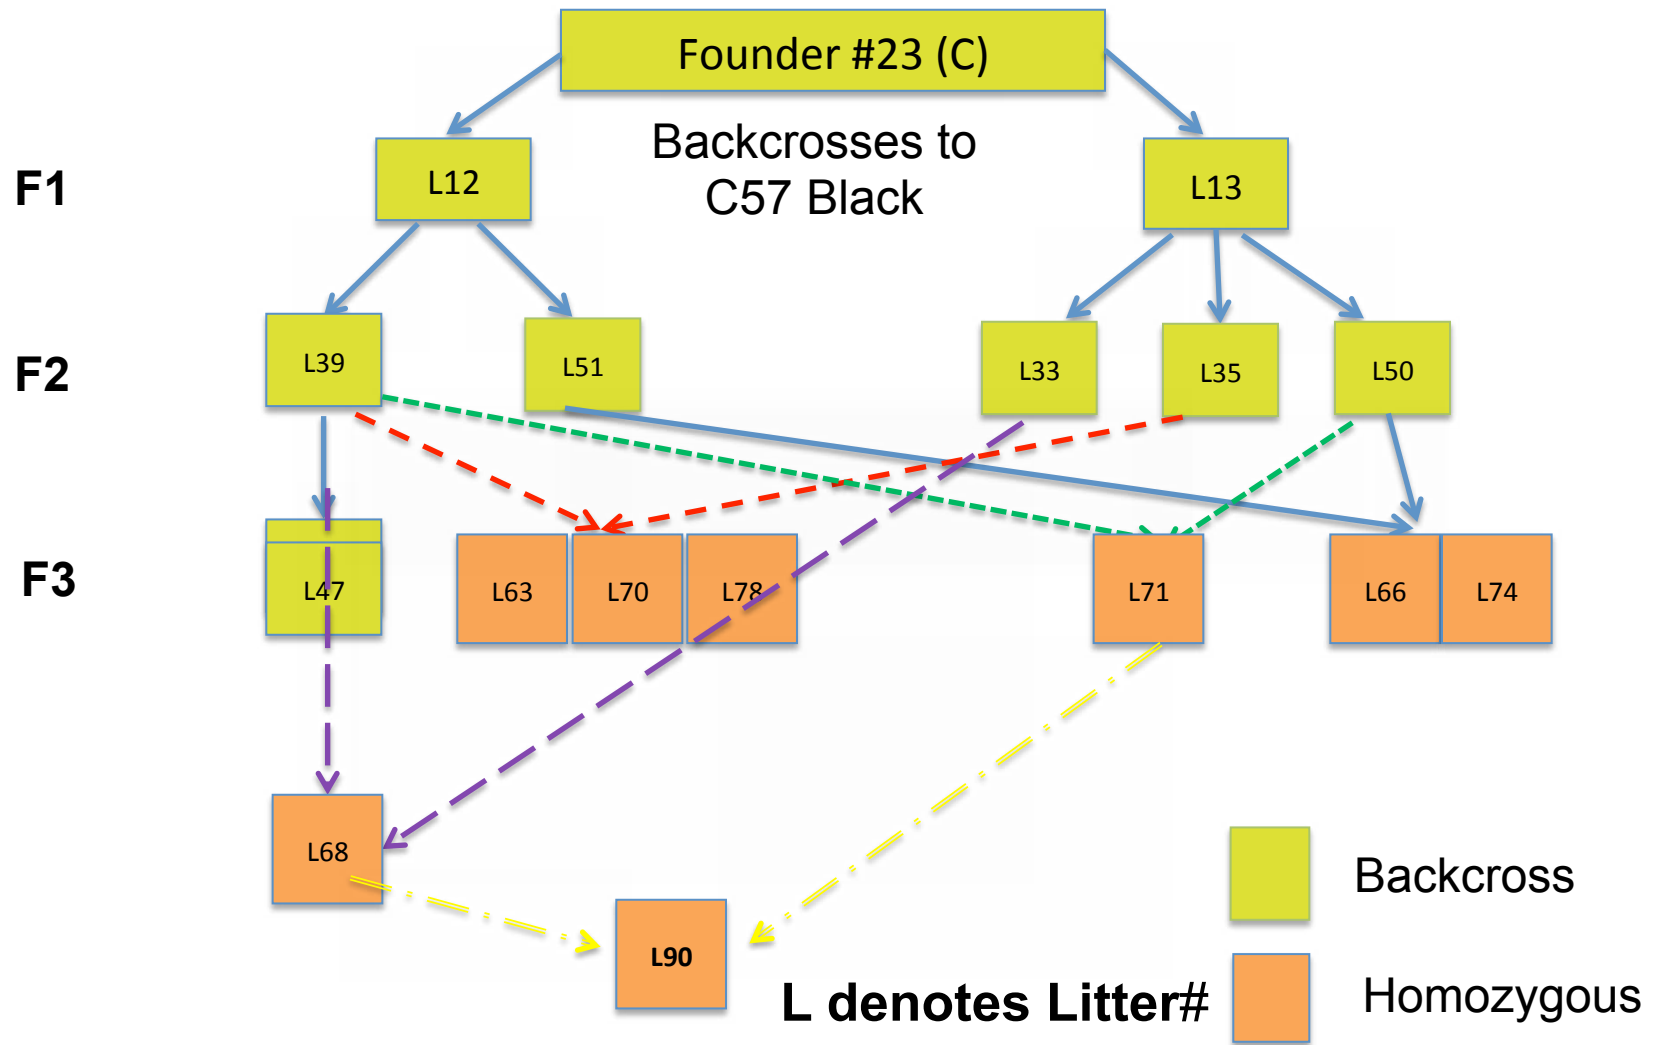

# Supplemental Figure S8. C. qPCR analysis of the SUN1mRFP1Flag transgene in D-line during selfing to make homozygous line.

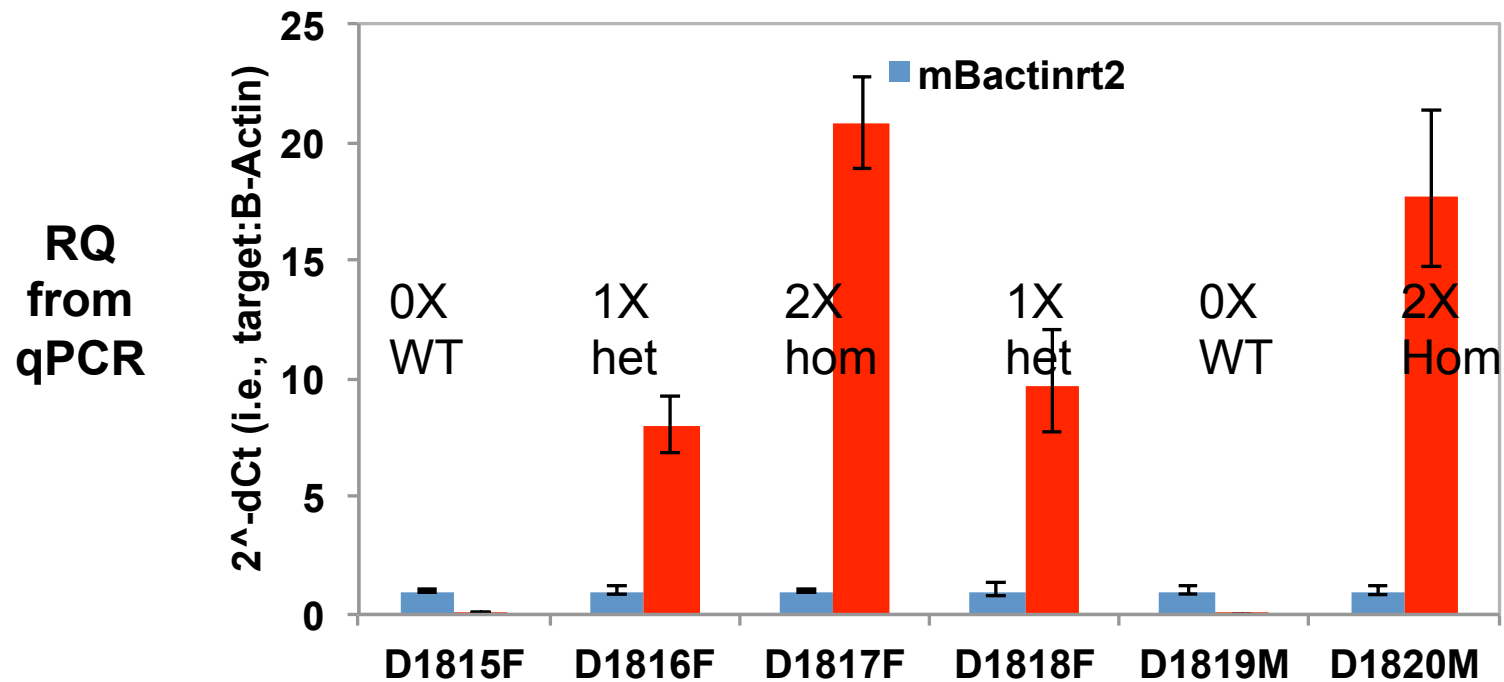

An mRFP1 gene primer pair was used to determine RQ. See Supplemental Table S1.

# Supplemental Figure S8. D. qPCR analysis of SUN1mRFP1Flag transgene during maintenance of stable homozygous D-line.

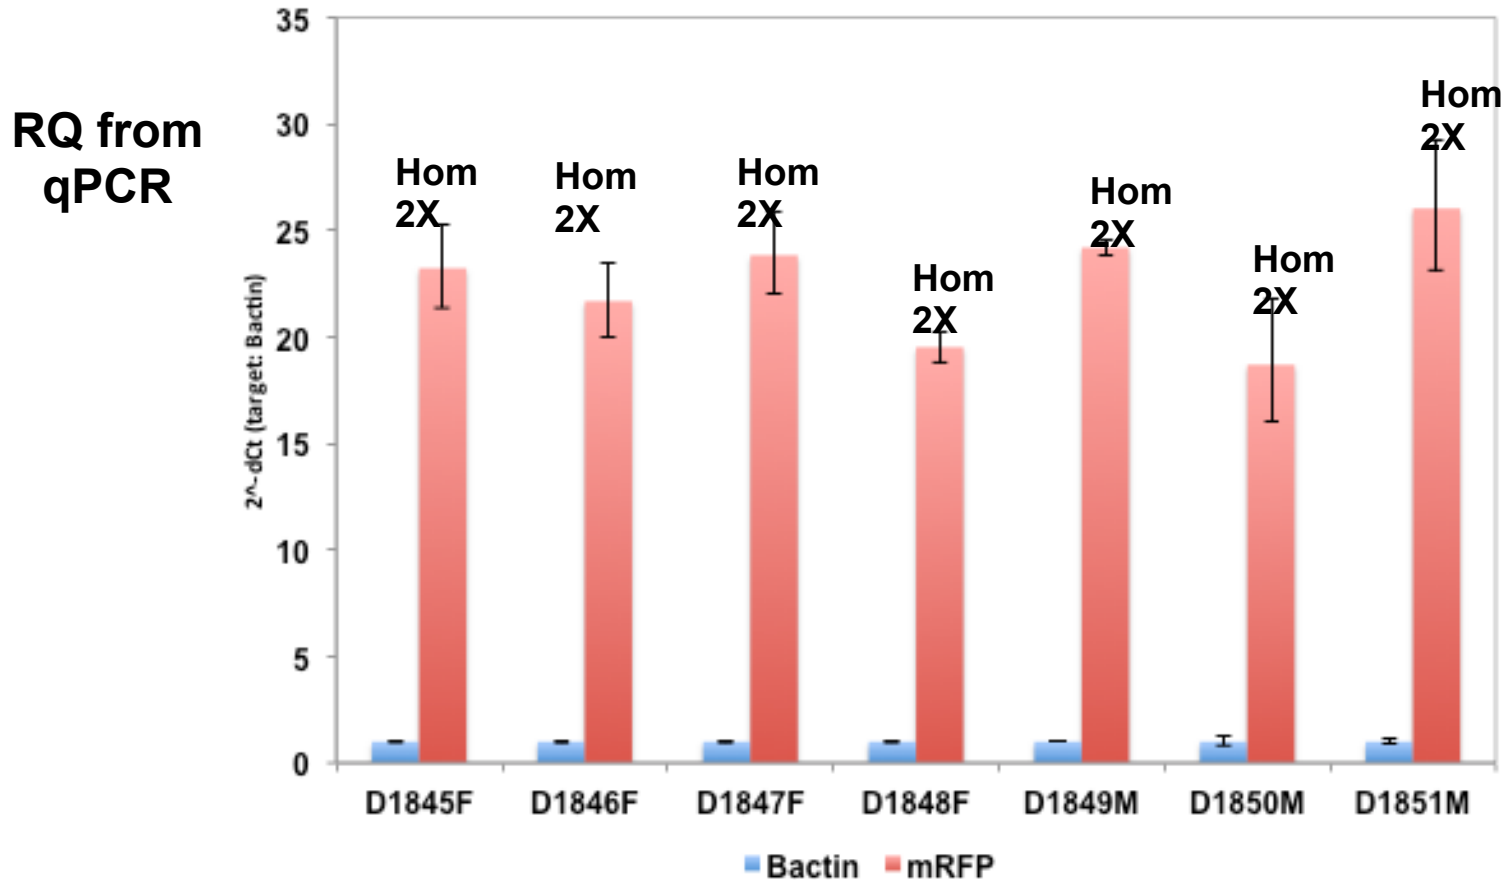

Several dozen mice were screened showing the line is indeed homozygous for the SUN1mRFP1Flag transgene.
