# Supplementary material for: Adipocyte nuclei captured from VAT and SAT
Source: PubMed Central journal article supplement (PMC4949929; doi:10.1186/s40608-016-0112-6), 2016-07-19

# Supplemental Figure S7: Enrichment protocol for SAT, VAT, and BAT cellular nuclei prior to capture.

A. BAT, VAT, and SAT were harvested from 4 locations in the mouse.

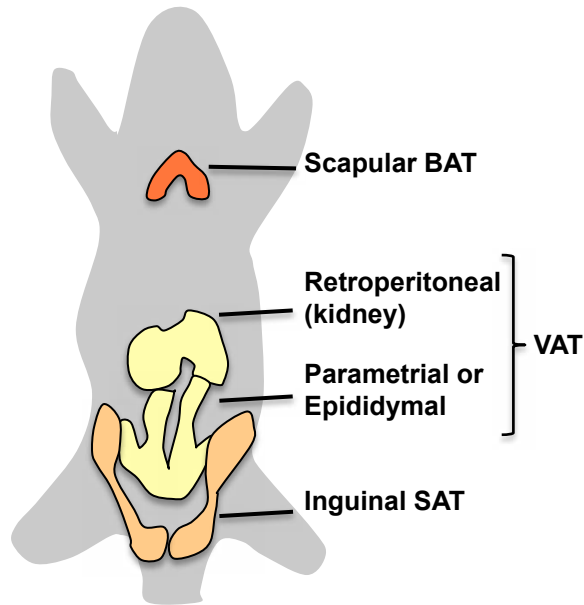

B. Nuclear Isolation Protocol

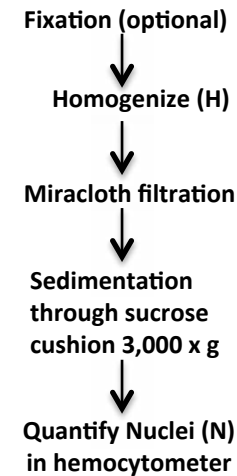

# Supplemental Figure S7: continued

C. Nuclear count & purity of DAPI stained nuclei were evaluated on a hemocytometer using combined IFM and DIC microscopy

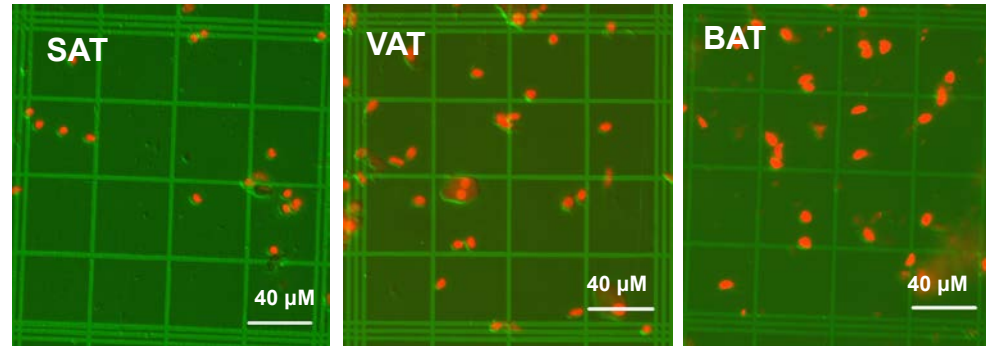

D. Western analysis of nuclear protein enrichment

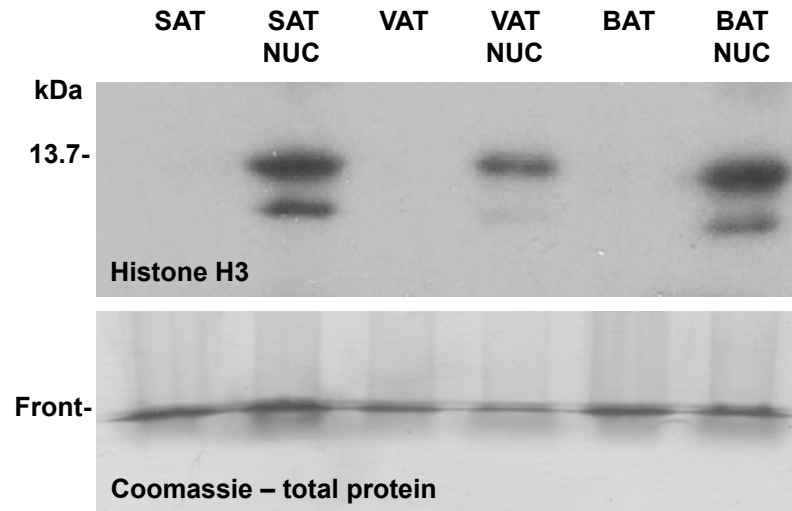

Supplement: 40608_2016_112_MOESM8_ESM.pdf [file 40608_2016_112_MOESM8_ESM.pdf]
