# Supplementary material for: Adipocyte nuclei captured from VAT and SAT
Source: PubMed Central journal article supplement (PMC4949929; doi:10.1186/s40608-016-0112-6), 2016-07-19
Supplement: 40608_2016_112_MOESM9_ESM.pdf [file 40608_2016_112_MOESM9_ESM.pdf]

# Supplemental Table S1. Oligonucleotide primers for qRT-PCR.

Each primer pair listed amplifies a single cDNA based on the derivative of the thermal dissociation curve of each qRT-PCR product using VAT, SAT, and/or BAT cDNA.

| Endogenous Controls       | Forward                       | Reverse                       |
|---------------------------|-------------------------------|-------------------------------|
| Bactin                    | 5' ACCTTCCAGCAGATGTGGAT 3'    | 5' TAGAAGCACTTGCGGTGCACGA 3'  |
| SDHA-S3                   | 5' CTCTTTCCTACCCGATCACATAC 3' | 5' CCATCTCCAGTTGCTCTCTC 3'    |
| <b>Figure 4A</b>          |                               |                               |
| ADIPOq                    | 5' CCGGGACTCTACTACTTCTCTT 3'  | 5' TTCCTGATACTGGCTAGGT 3'     |
| PPARG2                    | 5' CAGGCTTCCACTATGGAGTTC 3'   | 5' GGCAGTTAAGATCACACCTATCA 3' |
| FABP4                     | 5' GCTCCTCCTCGAAGGTTTAC 3'    | 5' CCCACTCCCATTCTTTCAT 3'     |
| LEP                       | 5' TGAGGGTAGAGGATGTGTTAGA 3'  | 5' GTGGCCACAGAGGTAAGAAA 3'    |
| EDNRB                     | 5' GGTGGCTGTT'CACTTCTACT3'    | 5' ATCTGCATACCGCTCTTCTC3'     |
| <b>Figure 4B</b>          |                               |                               |
| IKZF1                     | 5' AAGAGCGATGCCACAACACTAC 3'  | 5' GGACCTCTCTGCTCTATCTT 3'    |
| PCAM1                     | 5' CACCCATCACTTACCACCTTATG 3' | 5' TGTCTCTGGTGGGCTTATCT 3'    |
| FAM132A                   | 5' TGCACCAGGGATCTCACTA 3'     | 5' CAGCCAGCAGAGCTAACAA 3'     |
| RETN                      | 5' GACAGGAGCTAATACCCAGAAC 3'  | 5' CAGTTCAGGGACAAGGAAAGAA 3'  |
| SERPINF1                  | 5' GGAGTGCAGATCTCTTTAGC 3'    | 5' CCTCCTCATTCACTTCCACATAG 3' |
| TNFα                      | 5' TTGTCTACTCCAGGTTCTCT 3'    | 5' GAGGTTGACTTTCCTCGGTATG 3'  |
| SERPINE1                  | 5' GGGACGAACTGGAGATGTTAT 3'   | 5' GGGATGCTGGTTGGAAAGA 3'     |
| CD144                     | 5' CATCTAGGGTTCTGGTCTTTGG 3'  | 5' CTGGTGTCACTCCTTGGAAAT 3'   |
| ET1                       | 5' GACCATCTGTGTGGCTTCTAC 3'   | 5' GGAACACCTCAGCCTTCTT 3'     |
| <b>Figure 4C</b>          |                               |                               |
| ILF3                      | 5' CTTCCCTTCAGATGCCACTAC 3'   | 5' CATATTTGAGGCCACGTCTCT 3'   |
| <b>Figure 4D</b>          |                               |                               |
| GATA2                     | 5' ATACCCACCTATCCCTCTATG 3'   | 5' AGCCTTGCTCTCTGCTTAG 3'     |
| KLF2                      | 5' GGCTAGATGCCTTGAGAAA 3'     | 5' TGCCATCGTCTCCCTTATAGA 3'   |
| IHH                       | 5' CCATCACTCAGAGGAGTCTTTAC 3' | 5' CGCCAGCAGTCCATACTTATT 3'   |
| VEGFA                     | 5' AGGCTGCTGTAAACGATGAAG 3'   | 5' TCTCCTATGTGCTGGCTTTG 3'    |
| CEBPA                     | 5' GGTTCCTGGGTGAGTTCAT 3'     | 5' AACCTAGGTCTCTGTCTCTAC 3'   |
| <b>Figure 4E &amp; 4F</b> |                               |                               |
| UCP1                      | 5' CACTGTCTGTCTGGACTTCATC 3'  | 5' CAAAGGGTTTGTGGCTTCTT 3'    |
| PRDM16                    | 5' ACCTGCCACAGCAAAGAA 3'      | 5' CCATCCAAGCAGAGAAGTAGAC 3'  |
| <b>Figure 5A</b>          |                               |                               |
| TET1                      | 5' CTGAAGATGACAAGCAGCAAAC 3'  | 5' GGTGTGTGTCAGTGGGTAAA 3'    |
| TET2                      | 5' CTCATGCCTCGGGTTCATATT 3'   | 5' CTGGCACACTCCCATTGTAT 3'    |
| TET3                      | 5' CTTCCCTCCTTGGCTACTATG 3'   | 5' GAGGTCTGGCTTCTCTCAA 3'     |
| TDG                       | 5' CCACGAATAGCGGTGTTAATG 3'   | 5' GAGTTTCTGTCTGGGATCTT 3'    |
| DNMT1                     | 5' CCATCTTCTTGTCTCCCTGTATG 3' | 5' GGTGCTTTTGTCTTCTCCTT 3'    |
| DNMT3A                    | 5' GTCTCAACAGCACCATTCTT 3'    | 5' TGTGGTAGGCACCTGAAATAC 3'   |
| GADD45B                   | 5' GTGAAGAGAGCAGAGGCAATAA 3'  | 5' CGACAGTTGCTTTAGATGTTTGG 3' |
| GADD45A                   | 5' GATGACTTTGCAGAGGGAGAG 3'   | 5' CTTTCTTGCAGTGCCTTGTAGTT 3' |
| <b>Figure 5B</b>          |                               |                               |
| KAT2B                     | 5' AGGAGACCTCCAGCAGATAAT 3'   | 5' CCATCTCTTCTCTGACACATTC 3'  |
| KDM4A                     | 5' ATTTGGAGCCTTCACTCAGAG 3'   | 5' CAGTGGTGGTAAAGCACATTTT 3'  |
| PRMT1                     | 5' TGGAGGACTACCTAACAGTGAA 3'  | 5' GAAGTCCAGGTCGATGGTAAAG 3'  |
| CARM1                     | 5' GCGGATTTGCACAGGATAGA 3'    | 5' GGAGCCAATGAAAGCAACATC 3'   |
| PRMT5                     | 5' GAACTCTGAAGCGGCTATGT 3'    | 5' CTGGCCAGATTCGTGTTATCT 3'   |
| PAXIP1                    | 5' GCTAACATCCAGCCTTCTTCT 3'   | 5' ACCCAGTGAAGAGCACTAAAG 3'   |
| ARID1A                    | 5' TATGGAGGTCCTTACGACAGAG 3'  | 5' GGGTGAAGGCATGAGATTT 3'     |
| SETDB1                    | 5' CGCCTGGAACCTATGTTTAGT 3'   | 5' CTCCTCACAGCACCATATTAG 3'   |
| <b>Figure S8 A-E</b>      |                               |                               |
| mRFP                      | 5' CCGTAATGCAGAAGAAGACCA 3'   | 5' CTTCAGCTTCAGCCTCATCTT 3'   |
